# Supplementary material for: O impacto do desenvolvimento sustentável no poder de compra
Source: Royal Society of Chemistry journal article supplement (doi:10.1039/c5tb01537e), 2014-02-14
Supplement: c5tb01537e1.pdf [file c5tb01537e1.pdf]

## Supporting Information

### **A Supramolecular Brush Polymer via the Self-assembly of Bridged Tris( $\beta$ -cyclodextrin) with a Porphyrin Derivative and Its Magnetic Resonance Imaging**

Mo Sun, Heng-Yi Zhang,\* Qian Zhao, Xin-Yue Hu, Li-Hua Wang, Bo-Wen Liu, and  
Yu Liu\*

Department of Chemistry, State Key Laboratory of Elemento-Organic Chemistry,  
Nankai University, Collaborative Innovation Center of Chemical Science and  
Engineering, Tianjin 300071, People's Republic of China  
hyzhang@nankai.edu.cn, yuliu@nankai.edu.cn

# Table of Contents

|    |                                                                          |         |
|----|--------------------------------------------------------------------------|---------|
| 1. | $^1\text{H}$ NMR, $^{13}\text{C}$ NMR, MS and HRMS spectra of compounds. | S3—S11  |
| 2. | Binding Behaviors Between Mn(III)-TPP and <b>1</b> .                     | S12     |
| 3. | Formation of SBP <b>1</b> ·Mn(II)-TPP.                                   | S13     |
| 4. | Formation of SBPP with Fluorescence Probes and Targeted Agents.          | S14—S15 |
| 5. | Targeted Imaging.                                                        | S16     |

# 1. $^1\text{H}$ NMR, $^{13}\text{C}$ NMR, MS and HRMS spectra of compounds.

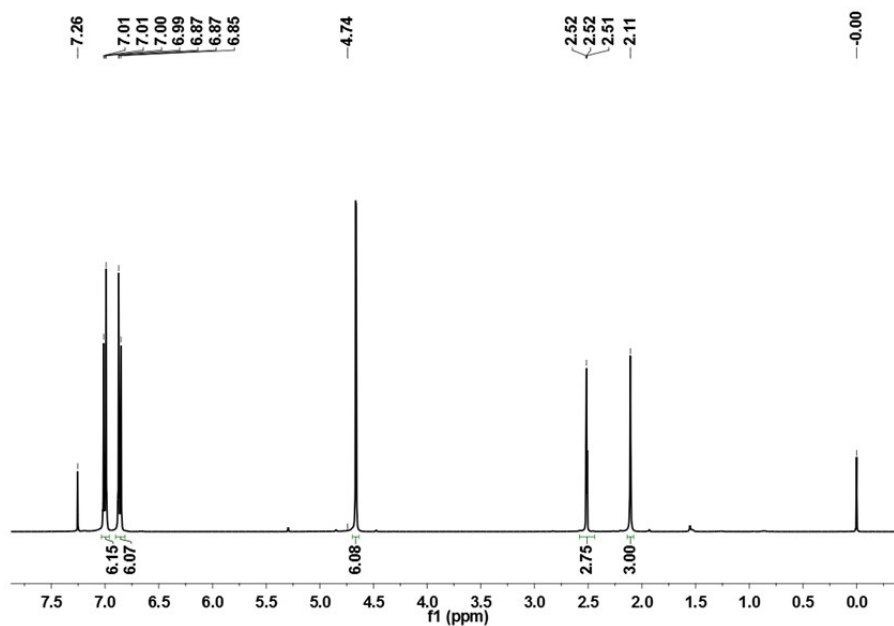

Figure S1.  $^1\text{H}$  NMR spectrum of **3** ( $\text{CDCl}_3$ , 400MHz, 298K).

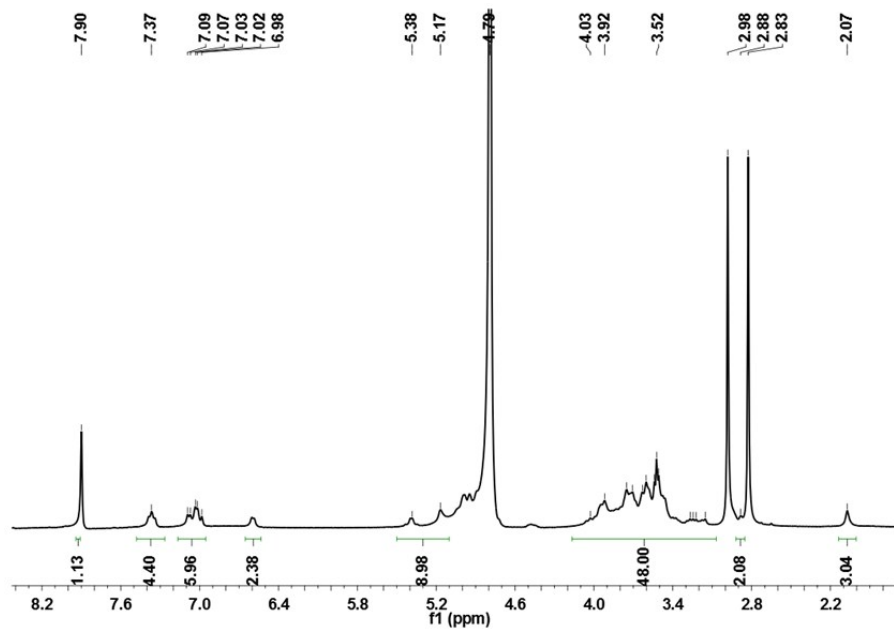

Figure S2.  $^1\text{H}$  NMR spectrum of **2** ( $\text{D}_2\text{O}$ , 400MHz, 298K).

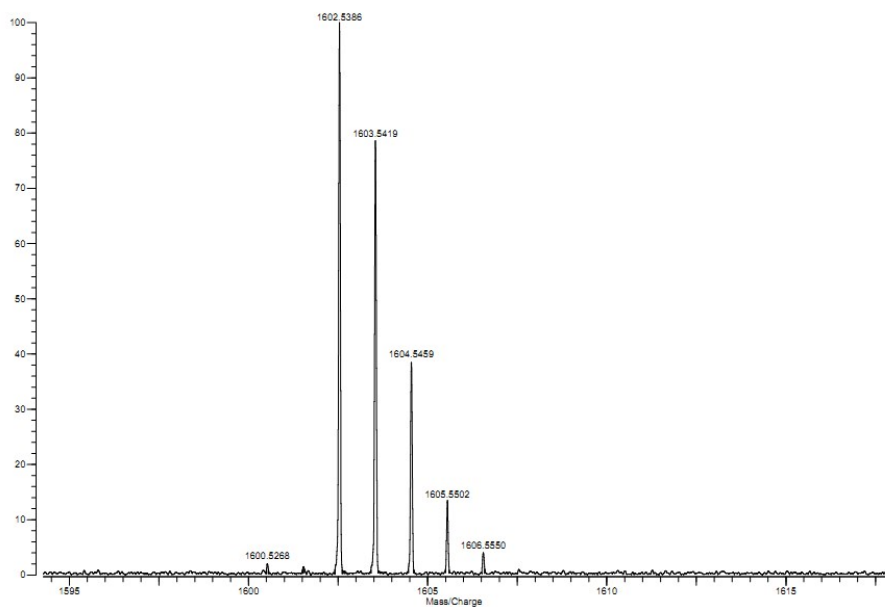

Figure S3. HRMS spectrum of 2.

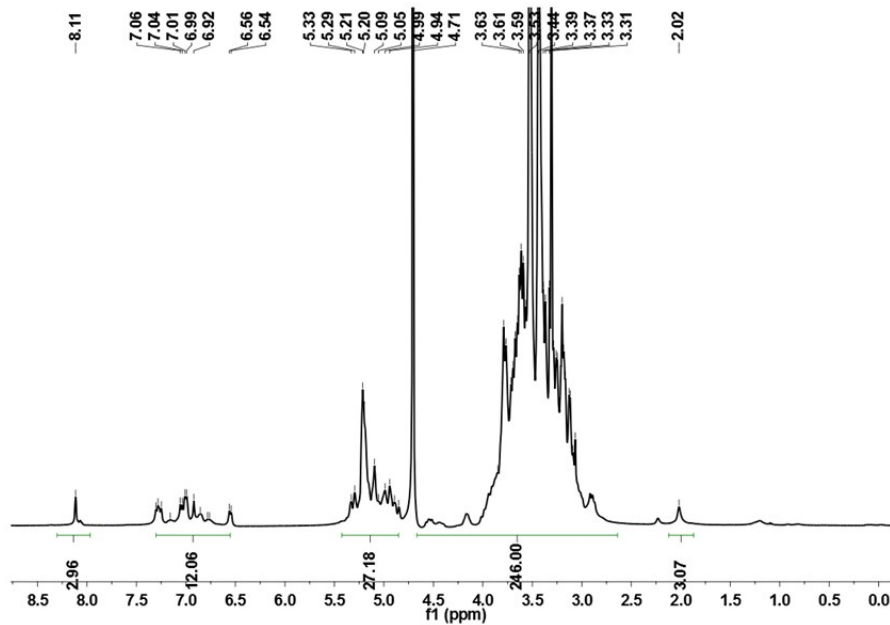

Figure S4. <sup>1</sup>H NMR spectrum of 1 (D<sub>2</sub>O, 400MHz, 298K).

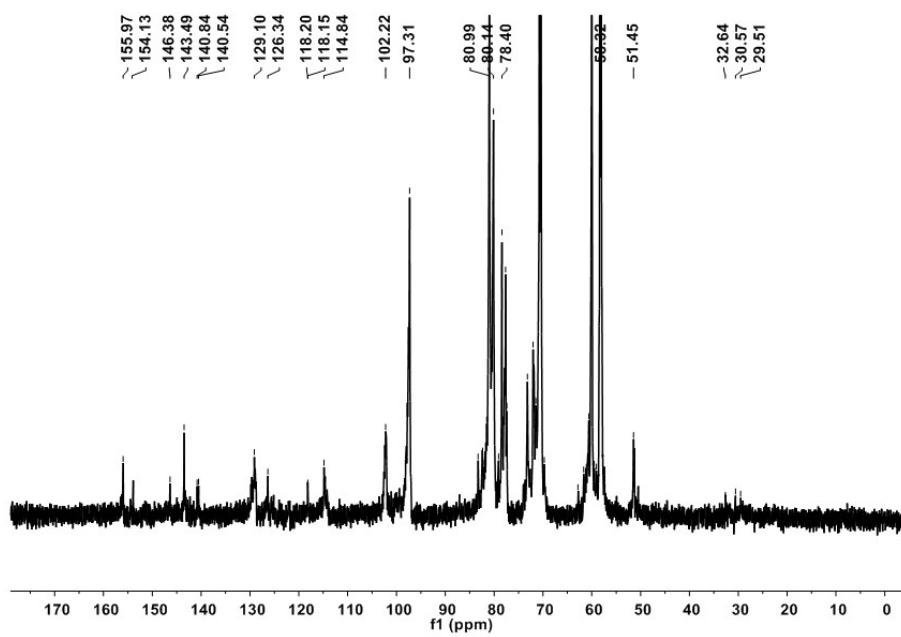

**Figure S5.**  $^{13}\text{C}$  NMR spectrum of **1** ( $\text{D}_2\text{O}$ , 100MHz, 298K).

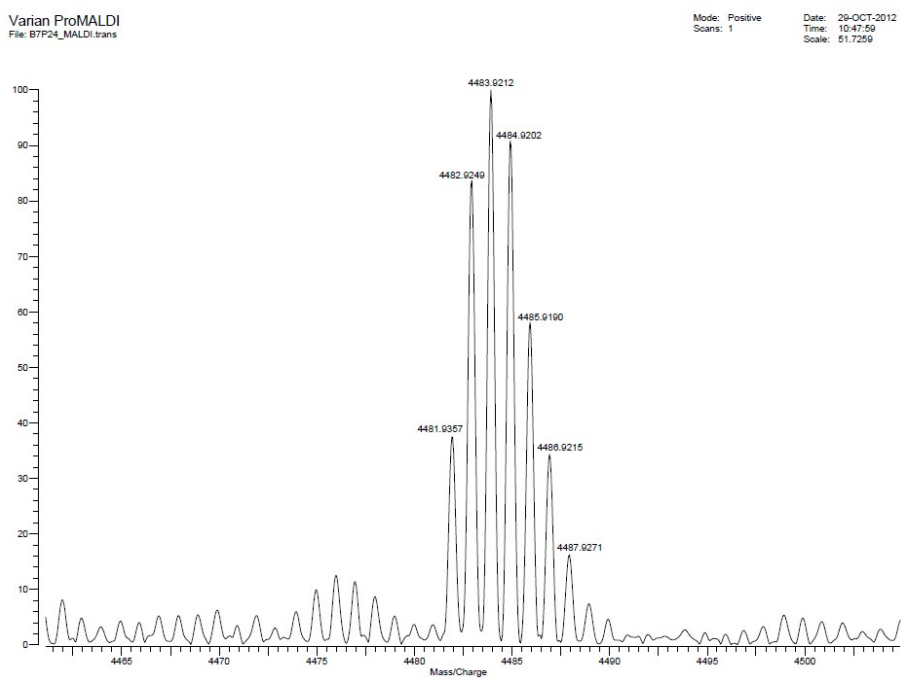

**Figure S6.** HRMS spectrum of **1**.

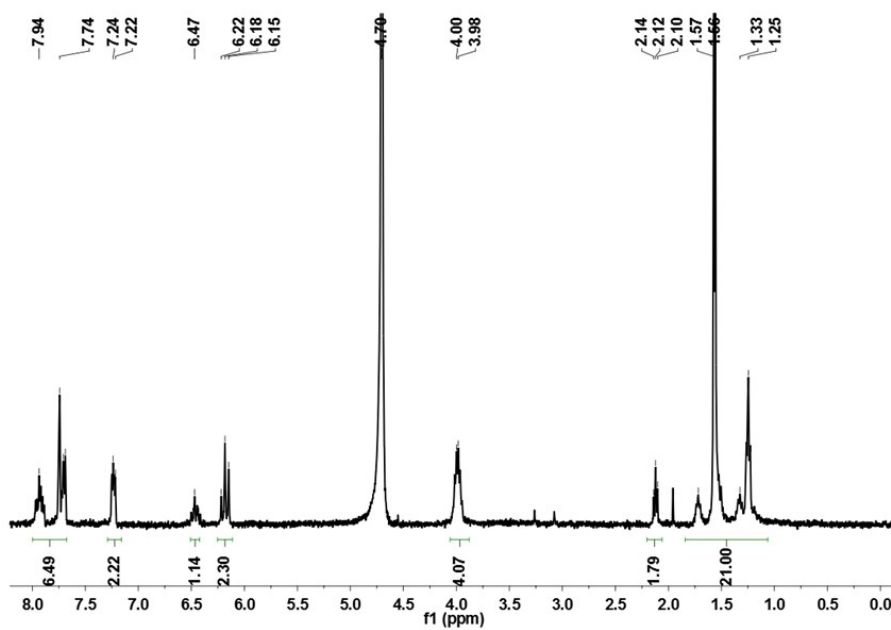

**Figure S7.**  $^1\text{H}$  NMR spectrum of Cy5 ( $\text{D}_2\text{O}$ , 400MHz, 298K).

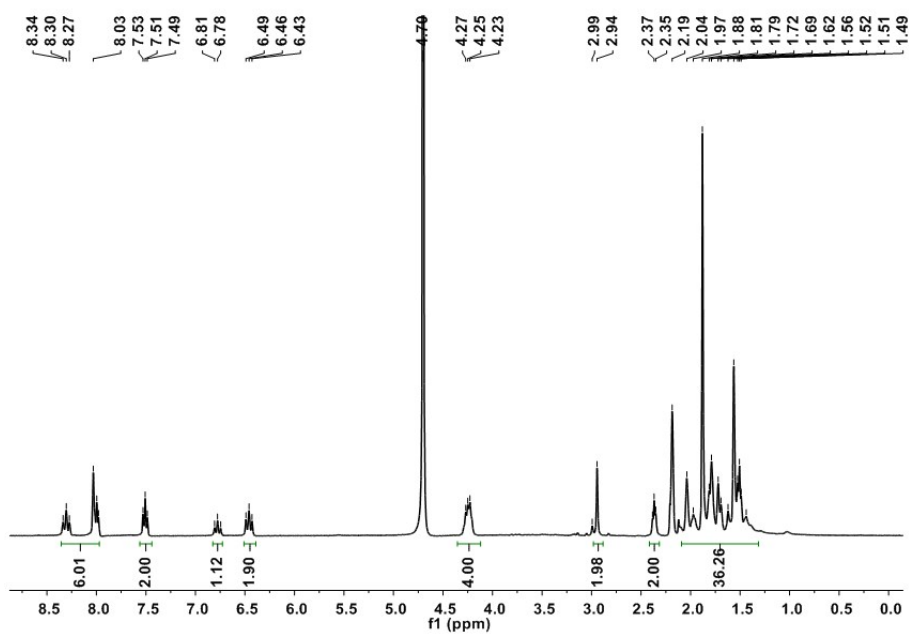

**Figure S8.**  $^1\text{H}$  NMR spectrum of Cy5-AD ( $\text{D}_2\text{O}$  and  $\text{CD}_3\text{CN}$  mixture, 400MHz, 298K).

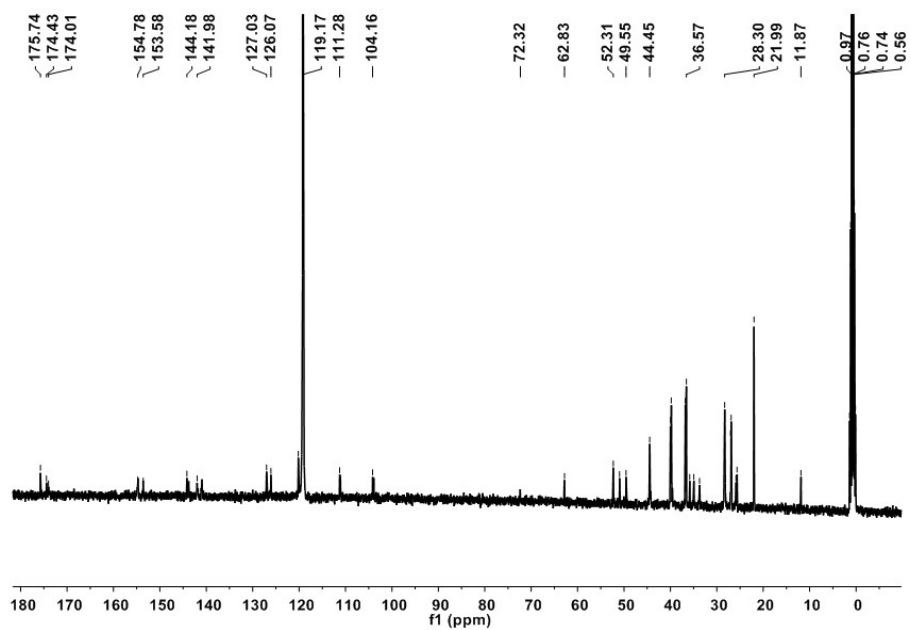

**Figure S9.**  $^{13}\text{C}$  NMR spectrum of **Cy5-AD** ( $\text{D}_2\text{O}$  and  $\text{CD}_3\text{CN}$  mixture, 100MHz, 298K).

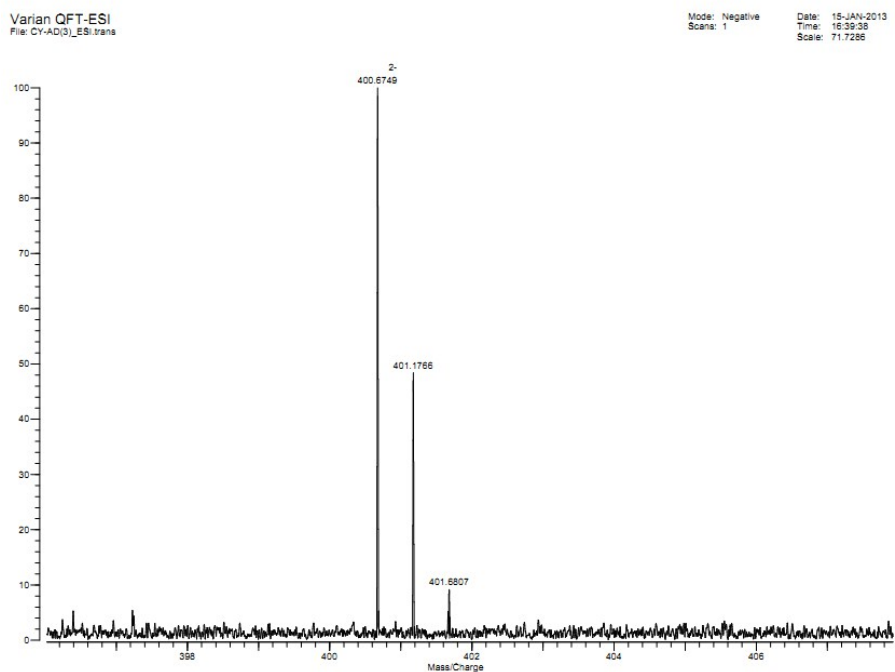

**Figure S10.** HRMS spectrum of **Cy5-AD**.

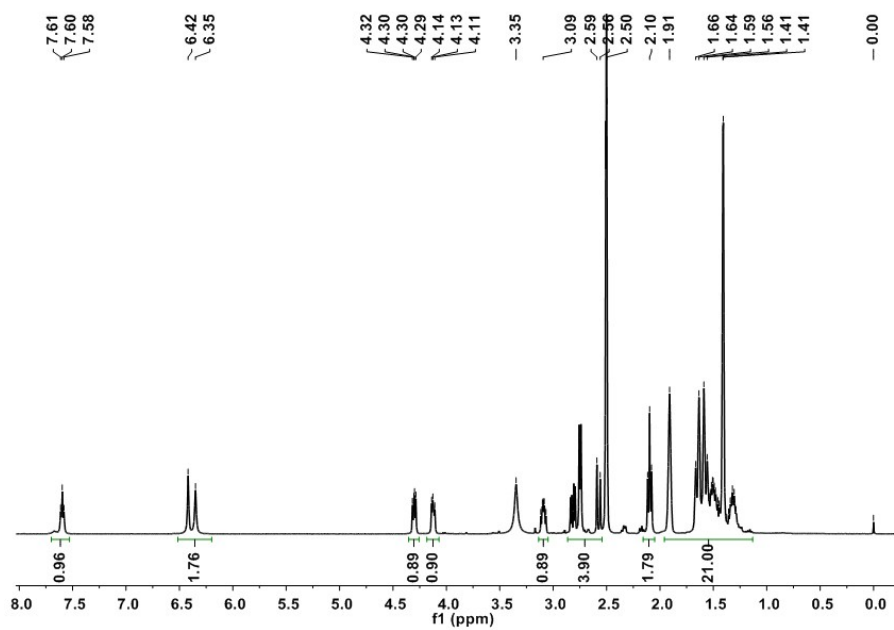

**Figure S11.**  $^1\text{H}$  NMR spectrum of **Biotin-AD** (DMSO, 400MHz, 298K).

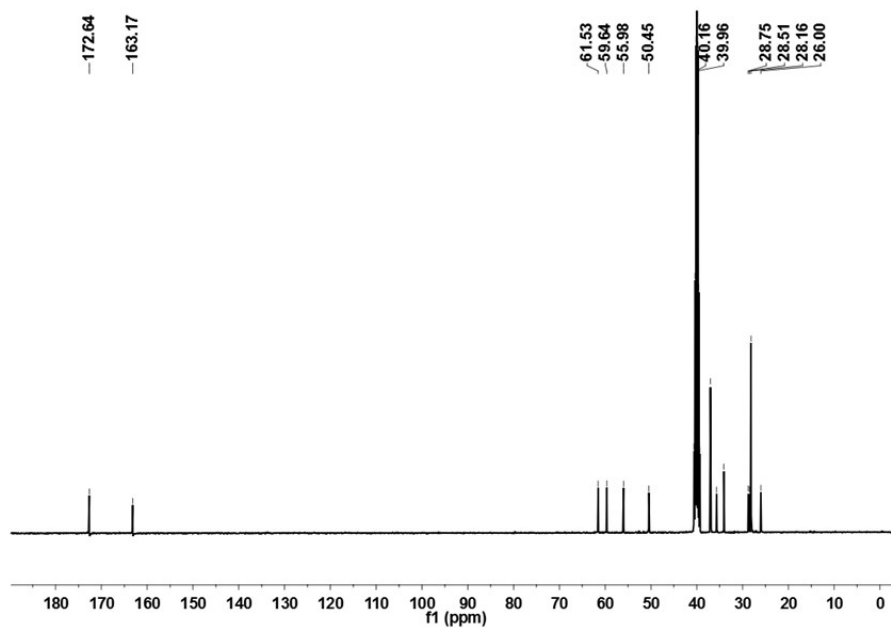

**Figure S12.**  $^{13}\text{C}$  NMR spectrum of **Biotin-AD** (DMSO, 100MHz, 298K).



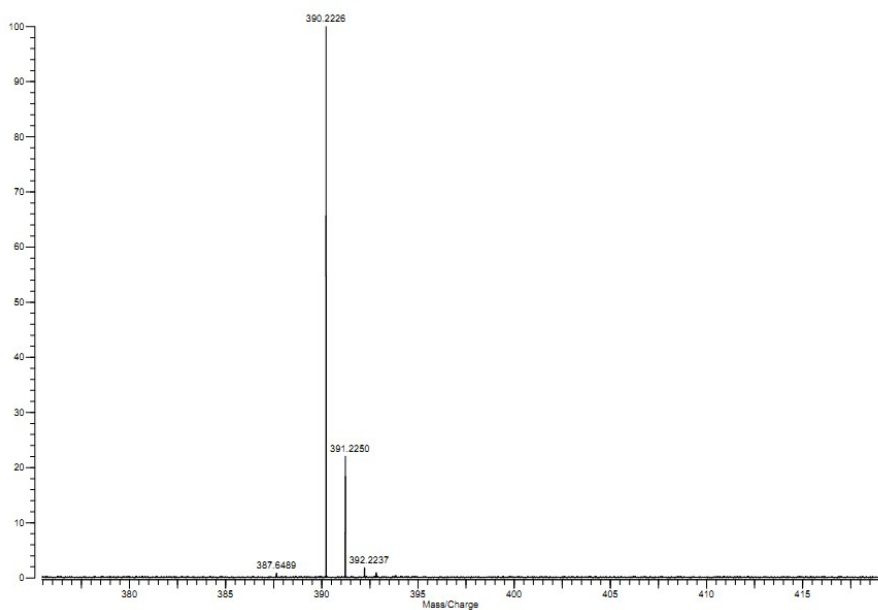

**Figure S13.** HRMS spectrum of **Biotin-AD**.

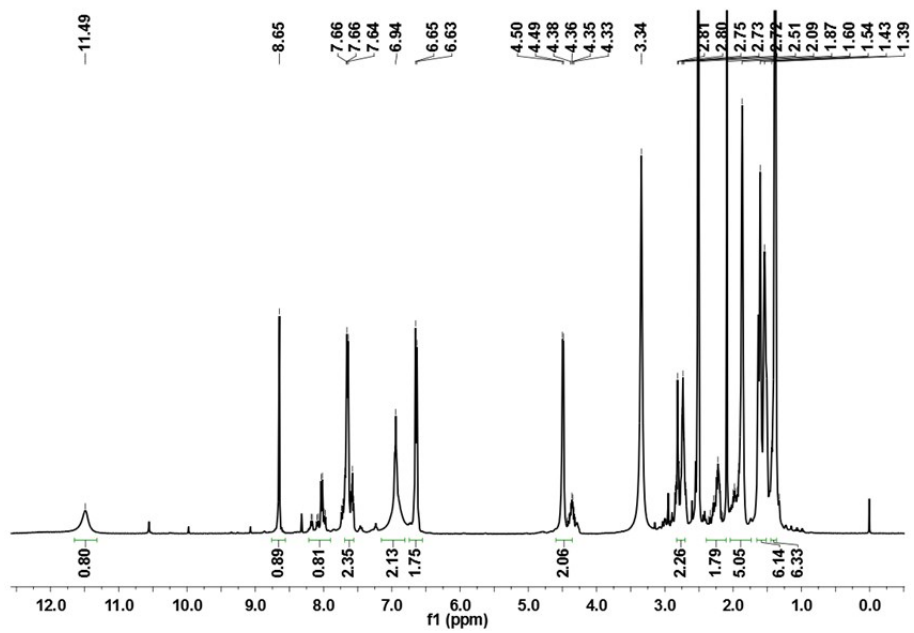

**Figure S14.**  $^1\text{H}$  NMR spectrum of FA-AD (DMSO, 400MHz, 298K).

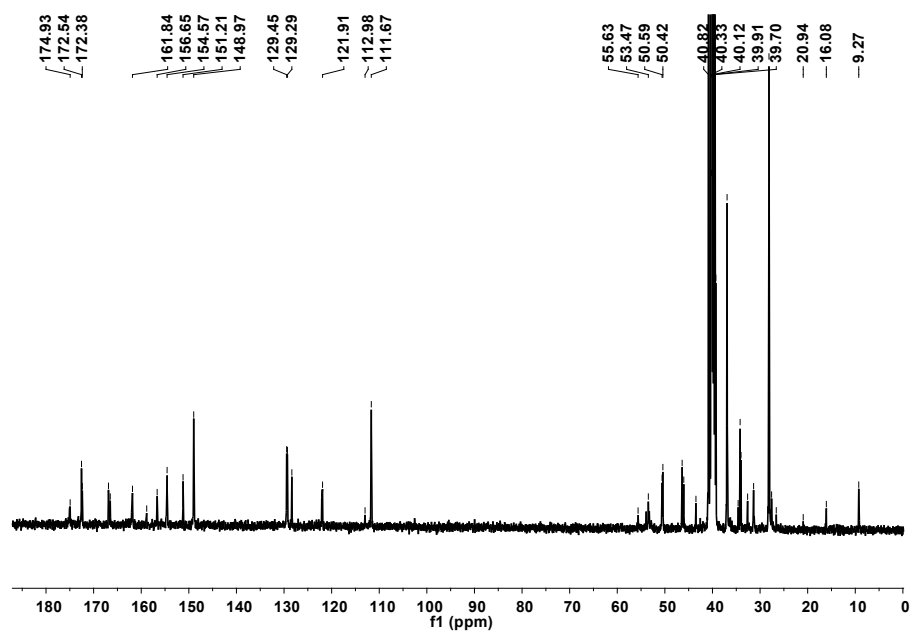

**Figure S15.**  $^{13}\text{C}$  NMR spectrum of FA-AD (DMSO, 100MHz, 298K).

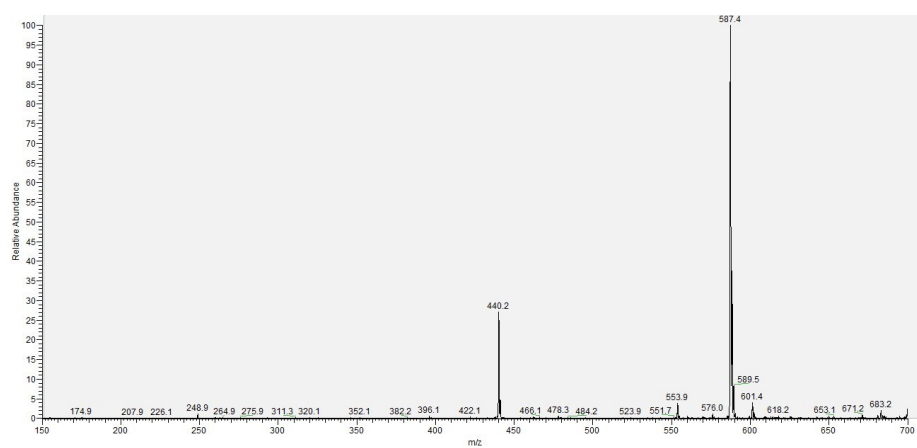

**Figure S16.** MS spectrum of FA-AD.

## 2. Binding Behaviors Between Mn(III)-TPP and 1.

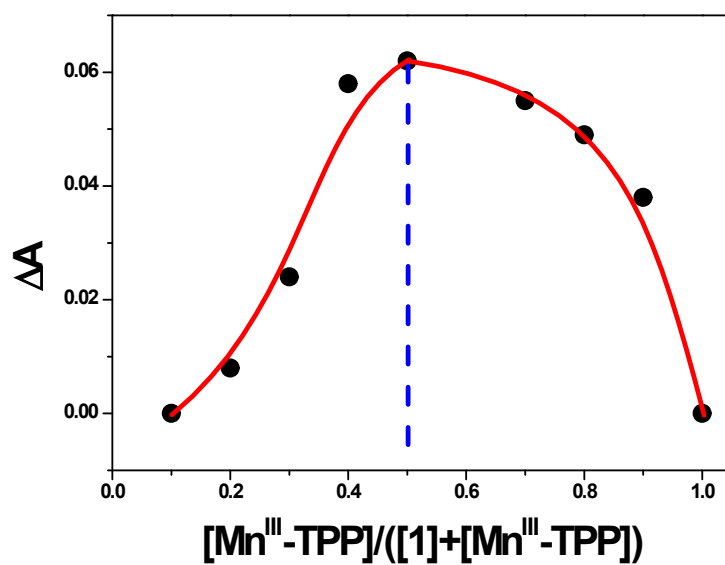

Figure S17. Job's plot of 1·Mn(III)-TPP.

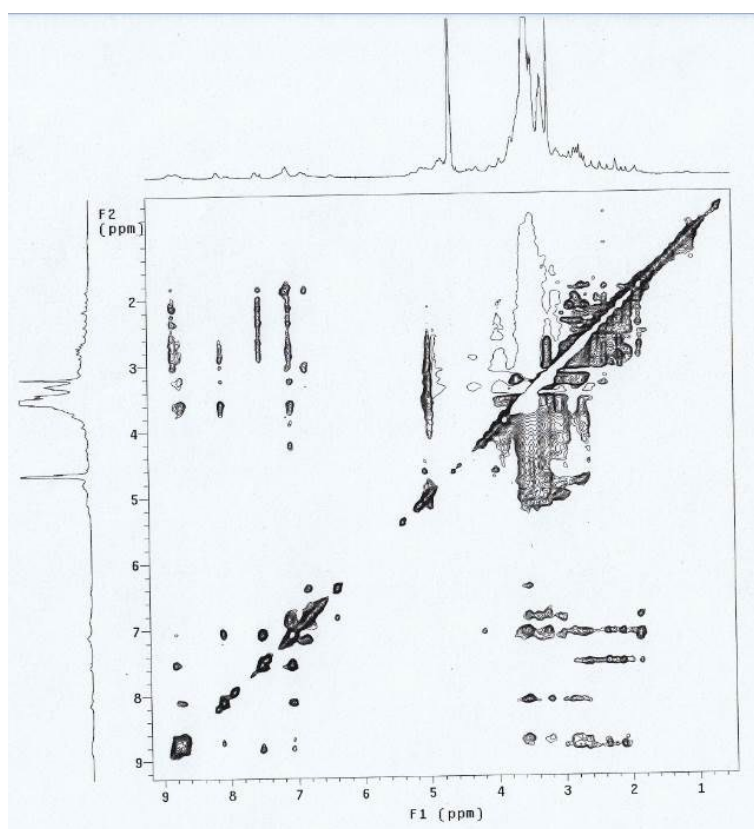

Figure S18. 2D NOESY spectra of 1·TPP in D<sub>2</sub>O at 25 °C.

### 3. Formation of SBPP 1·Mn(II)-TPP.

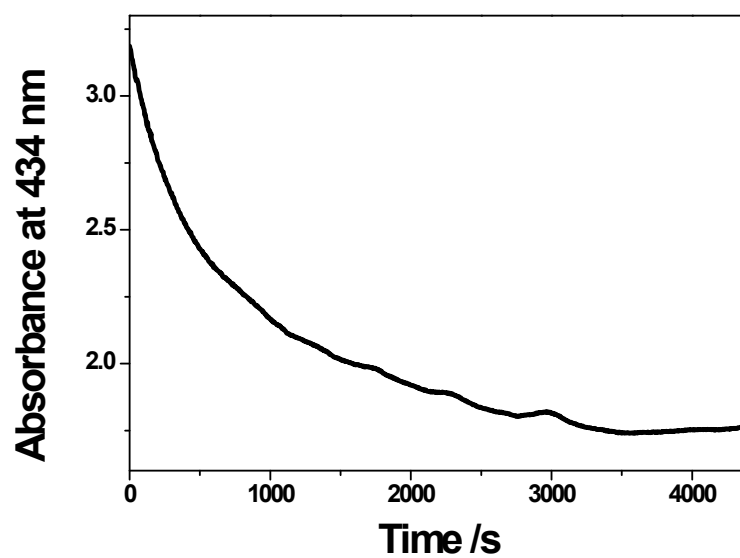

**Figure S19.** The time decay curve of the absorbance of 1·Mn(II)-TPP at 434 nm exposed in air.

#### 4. Formation of SBP Imaging Agents with Fluorescence Probes and Targeted Agents.

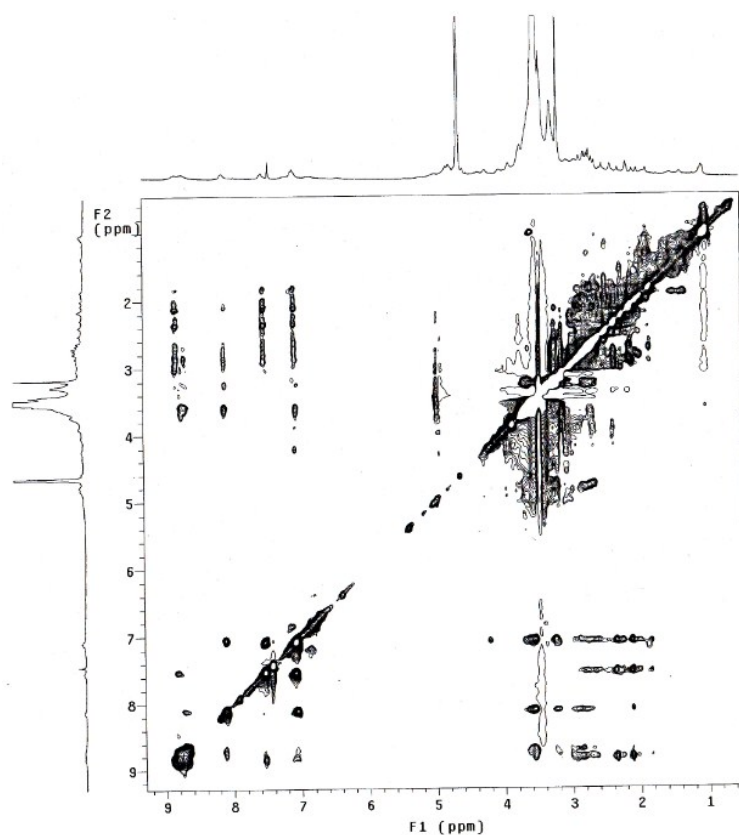

**Figure S20.** 2D NOESY spectra of **1**·TPP·Cy5-AD in D<sub>2</sub>O at 25 °C.

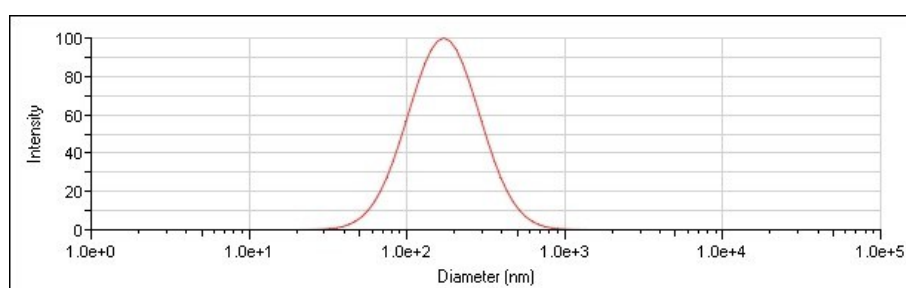

**Figure S21.** DLS for SBPP with the addition of 1-adamantanecarboxylic acid sodium salt.

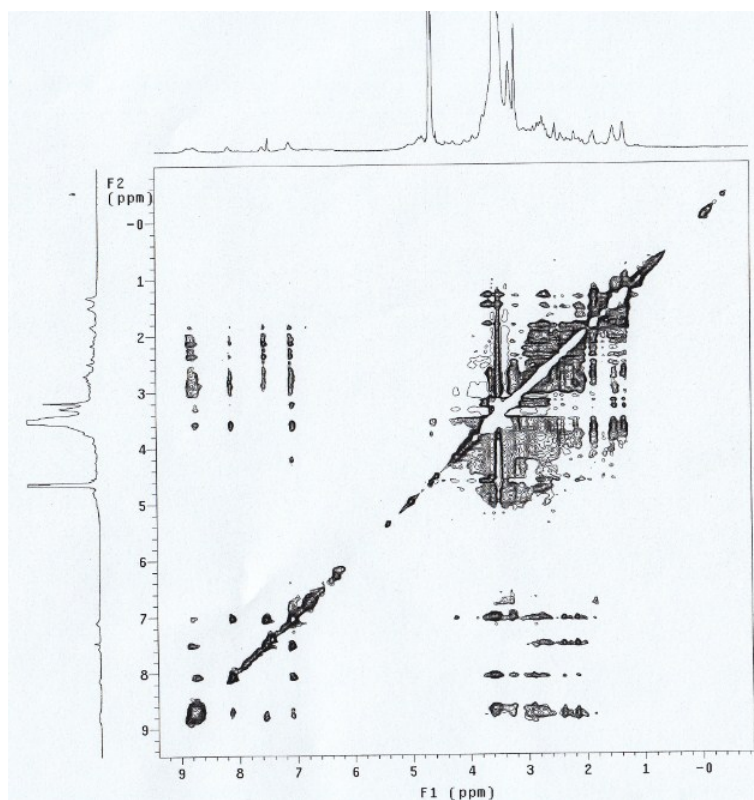

**Figure S22.** 2D NOESY spectra of **1**·TPP·Biotin-AD in D<sub>2</sub>O at 25 °C.

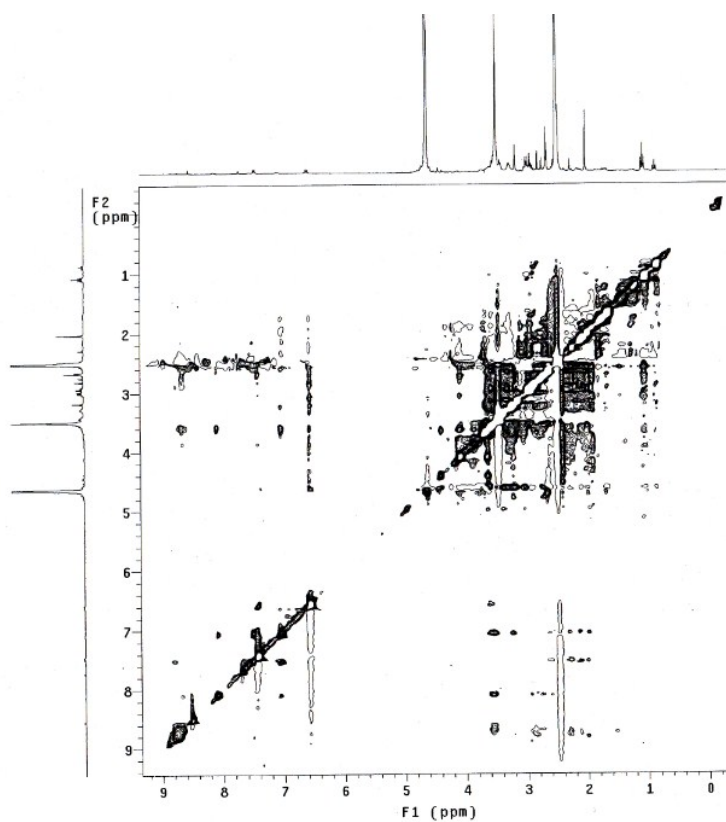

**Figure S23.** 2D NOESY spectra of **1**·TPP·FA-AD in D<sub>2</sub>O at 25 °C.

## 5. Targeted Imaging.

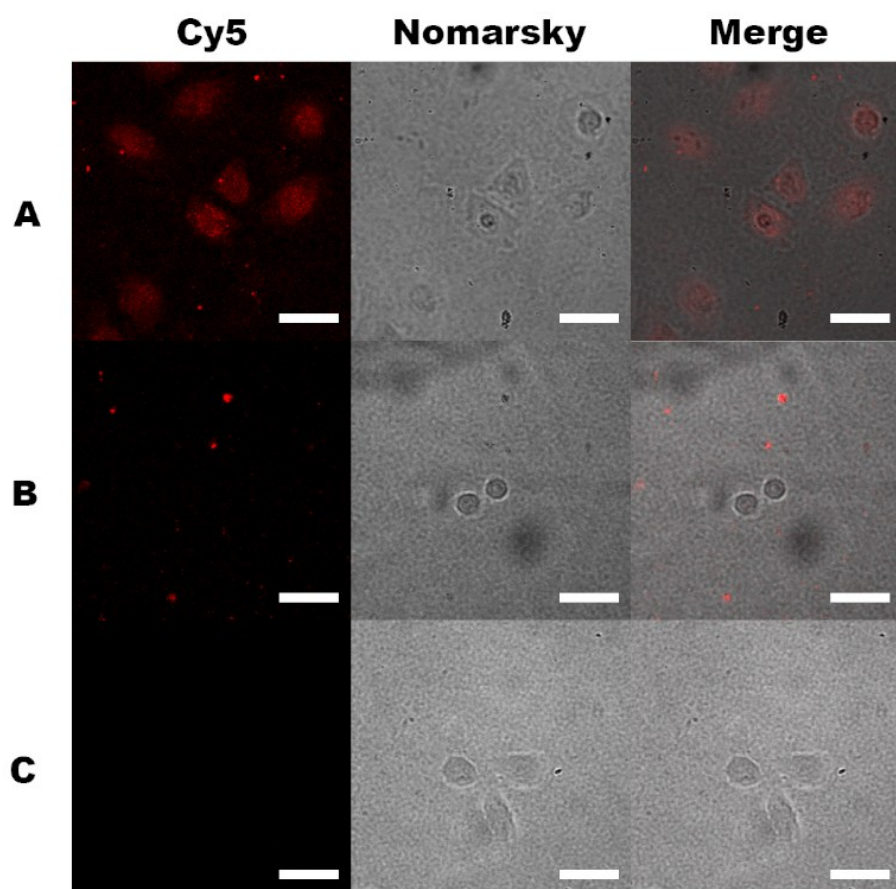

**Figure S24.** Confocal laser scanning microscopy imagings of (A) MCF7 cells in a medium of SBPP-CB (positive); (B) MCF7 cells in an excess biotin-supplemented medium of SBPP-CB (negative); (C) MCF7 cells in a medium of SBPP-C (negative). The scale bar is 15  $\mu\text{m}$ .
